# Supplementary material for: Balanced Chromosomal Rearrangements Associated with Hypoprolificacy in Australian Boars (Sus scrofa domesticus)
Source: MDPI journal article supplement (doi:10.3390/cells10082000), 2021-08-06
Supplement: s1 [file s1]

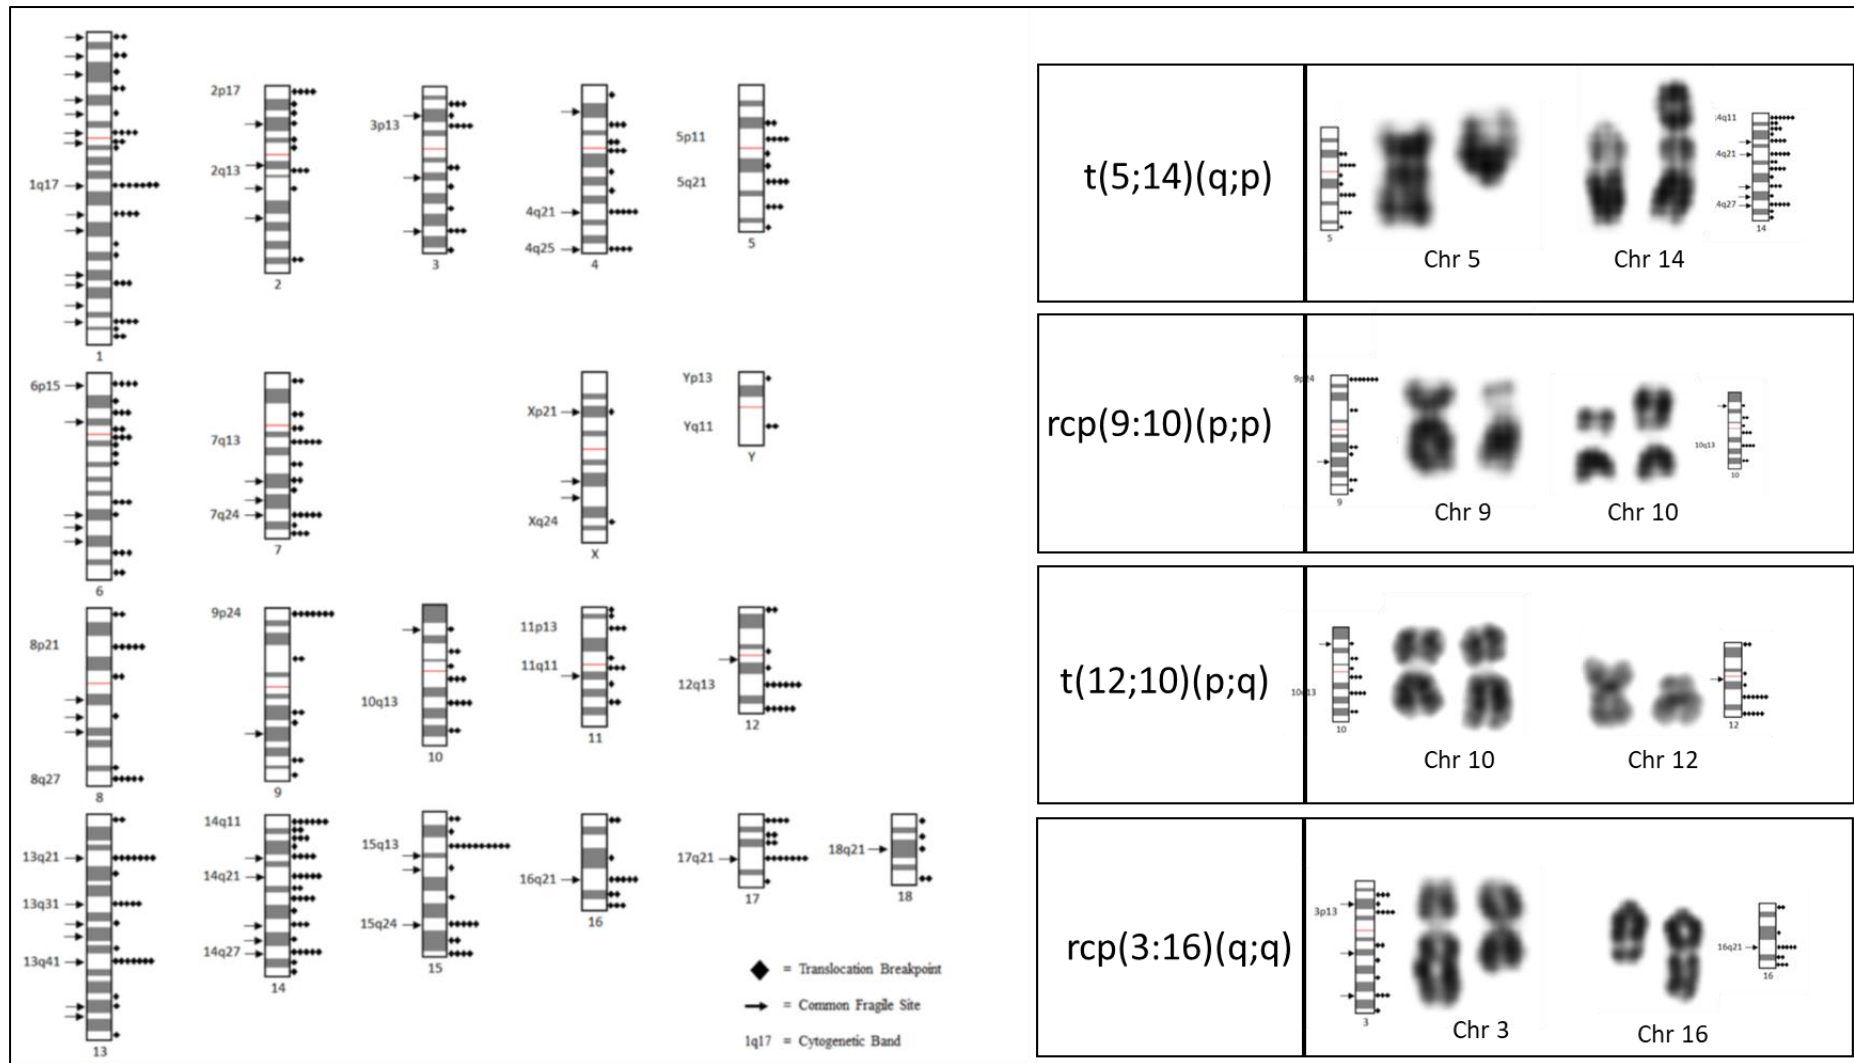

Figure S1: The comparison of chromosomal rearrangements evident in the current study and translocation breakpoints and common fragile sites in the pig karyotype presented by Donaldson et al. [20]
